# Supplementary material for: Hydrogen–deuterium exchange in imidazole as a tool for studying histidine phosphorylation
Source: PubMed Central journal article supplement (PMC4244536; doi:10.1007/s00216-014-8218-5), 2014-10-30
Supplement: 216_2014_8218_MOESM1_ESM.pdf [file 216_2014_8218_MOESM1_ESM.pdf]

## Hydrogen-deuterium exchange in imidazole as a tool for studying histidine phosphorylation

Małgorzata Cebo, Martyna Kielmas, Justyna Adamczyk, Marek Cebrat, Zbigniew Szewczuk, Piotr Stefanowicz\*

**Table S1.** The comparison of calculated and experimental masses for  $[MH]^+$  ions of model peptides and their monodeuterated analogues

| Peptide name | Peptide sequence             | Molecular formula                                              | Native peptide Found mass [Da] | Native peptide Calculated mass [Da] | Deuterated peptide Calculated mass [Da] | Deuterated peptide Found mass [Da] |
|--------------|------------------------------|----------------------------------------------------------------|--------------------------------|-------------------------------------|-----------------------------------------|------------------------------------|
| 1RH0         | H-Ala-Ala-Arg-His-Ala-Phe-OH | C <sub>30</sub> H <sub>45</sub> N <sub>11</sub> O <sub>7</sub> | 672.3764                       | 672.3582                            | 673.3639                                | 673.3893                           |
| 2DH0         | H-Ala-Ala-Asp-His-Ala-Phe-OH | C <sub>28</sub> H <sub>38</sub> N <sub>8</sub> O <sub>9</sub>  | 631.2815                       | 631.2835                            | 632.2897                                | 632.3107                           |
| 3RH1         | H-Ala-Arg-Ala-His-Ala-Phe-OH | C <sub>30</sub> H <sub>45</sub> N <sub>11</sub> O <sub>7</sub> | 672.3822                       | 672.3582                            | 673.3639                                | 673.3882                           |
| 4DH1         | H-Ala-Asp-Ala-His-Ala-Phe-OH | C <sub>28</sub> H <sub>38</sub> N <sub>8</sub> O <sub>9</sub>  | 631.2805                       | 631.2835                            | 632.2897                                | 632.3134                           |
| 5RH2         | H-Arg-Ala-Ala-His-Ala-Phe-OH | C <sub>30</sub> H <sub>45</sub> N <sub>11</sub> O <sub>7</sub> | 672.3822                       | 672.3582                            | 673.3639                                | 673.3891                           |
| 6DH2         | H-Asp-Ala-Ala-His-Ala-Phe-OH | C <sub>28</sub> H <sub>38</sub> N <sub>8</sub> O <sub>9</sub>  | 631.3058                       | 631.2835                            | 632.2897                                | 632.3114                           |
| 7OH0         | H-Ala-Ala-Ala-His-Ala-Phe-OH | C <sub>27</sub> H <sub>38</sub> N <sub>8</sub> O <sub>7</sub>  | 587.3133                       | 587.2936                            | 588.2999                                | 588.3195                           |

**Table S2.** The selected fragment ions for model peptides

| Peptide name | Peptide sequence             | Ion fragments | Found mass [Da] | Calculated mass [Da] |
|--------------|------------------------------|---------------|-----------------|----------------------|
| 1RH0         | H-Ala-Ala-Arg-His-Ala-Phe-OH | b4            | 436.2427        | 436.2421             |
|              |                              | y3            | 374.1855        | 374.1829             |
| 2DH0         | H-Ala-Ala-Asp-His-Ala-Phe-OH | b5            | 466.2195        | 466.2051             |
|              |                              | y4            | 489.2253        | 489.2098             |
| 3RH1         | H-Ala-Arg-Ala-His-Ala-Phe-OH | a5            | 479.2995        | 479.2843             |
|              |                              | b4            | 436.3552        | 436.2421             |
| 4DH1         | H-Ala-Asp-Ala-His-Ala-Phe-OH | b6            | 613.2953        | 613.2735             |
|              |                              | y4            | 445.2333        | 445.2200             |
| 5RH2         | H-Arg-Ala-Ala-His-Ala-Phe-OH | a5            | 479.2996        | 479.2843             |
|              |                              | b4            | 436.2552        | 436.2421             |
| 6DH2         | H-Asp-Ala-Ala-His-Ala-Phe-OH | b4            | 395.1675        | 395.1680             |
|              |                              | y3            | 374.1846        | 374.1829             |
| 7OH0         | H-Ala-Ala-Ala-His-Ala-Phe-OH | b5            | 422.2274        | 422.2152             |
|              |                              | y4            | 445.2334        | 445.2200             |

**Table S3.** The comparison of calculated and experimental masses for  $[MH]^+$  ions of monodeuterated analogues of phosphorylated peptides

| Peptide name | Peptide sequence             | Peptide with pHis<br>Calculated mass | Deuterated peptide<br>with pHis<br>Calculated mass | Deuterated peptide<br>with pHis<br>Found mass |
|--------------|------------------------------|--------------------------------------|----------------------------------------------------|-----------------------------------------------|
| 1RH0         | H-Ala-Ala-Arg-His-Ala-Phe-OH | 752.3239                             | 753.3302                                           | 753.3595                                      |
| 2DH0         | H-Ala-Ala-Asp-His-Ala-Phe-OH | 711.2498                             | 712.2561                                           | 712.2833                                      |
| 3RH1         | H-Ala-Arg-Ala-His-Ala-Phe-OH | 752.3239                             | 753.3302                                           | 753.3604                                      |
| 4DH1         | H-Ala-Asp-Ala-His-Ala-Phe-OH | 711.2498                             | 712.2561                                           | 712.2844                                      |
| 5RH2         | H-Arg-Ala-Ala-His-Ala-Phe-OH | 752.3239                             | 753.3302                                           | 753.3606                                      |
| 6DH2         | H-Asp-Ala-Ala-His-Ala-Phe-OH | 711.2498                             | 712.2561                                           | 712.2826                                      |
| 7OH0         | H-Ala-Ala-Ala-His-Ala-Phe-OH | 667.2600                             | 668.2662                                           | 668.2905                                      |

**Table S4.** CID fragmentation pattern for peptide DRVYJHPF

| Fragment       | Molecular formula        | Calculated m/z | Experimental m/z |
|----------------|--------------------------|----------------|------------------|
| $y_2^+$        | $C_{14}H_{19}N_2O_3$     | 263.1239       | 263.1451         |
| $[b_6]^{2+}$   | $C_{36}H_{55}N_{11}O_9$  | 393.2131       | 393.2232         |
| $b_4^+$        | $C_{24}H_{36}H_7O_7$     | 534.2676       | 534.2853         |
| $a_5^+$        | $C_{29}H_{47}N_8O_7$     | 619.3568       | 619.3791         |
| $b_5^+$        | $C_{30}H_{47}N_8O_8$     | 647.3517       | 647.3753         |
| $[y_6-H_2O]^+$ | $C_{40}H_{53}N_8O_7$     | 757.4037       | 757.4519         |
| $[b_6-NH_3]^+$ | $C_{36}H_{50}DN_{10}O_9$ | 768.4005       | 768.4219         |
| $b_6^+$        | $C_{36}H_{53}DN_{11}O_9$ | 785.4169       | 785.4489         |

**Table S5.** CID fragmentation pattern for peptide NHFWKTHT

| Fragment       | Molecular formula        | Calculated m/z | Experimental m/z |
|----------------|--------------------------|----------------|------------------|
| $[b_2-NH_3]^+$ | $C_{10}H_{11}N_4O_3$     | 235.0863       | 235.0822         |
| $b_2^+$        | $C_{10}H_{14}N_5O_3$     | 252.1097       | 252.1088         |
| $[y_3-NH_3]^+$ | $C_{14}H_{19}DN_5O_5$    | 341.1715       | 341.1840         |
| $y_3^+$        | $C_{14}H_{22}DN_6O_5$    | 358.1949       | 358.1884         |
| $b_3^+$        | $C_{19}H_{23}N_6O_4$     | 399.1781       | 399.1783         |
| $[b_4-NH_3]^+$ | $C_{30}H_{30}N_7O_5$     | 568.2340       | 568.2369         |
| $b_4^+$        | $C_{30}H_{33}N_8O_5$     | 585.2574       | 585.2603         |
| $[z_5-H_2O]^+$ | $C_{31}H_{41}DN_9O_6$    | 637.3322       | 637.3296         |
| $[y_5-H_2O]^+$ | $C_{31}H_{42}DN_{10}O_6$ | 654.3587       | 654.3570         |
| $y_5^+$        | $C_{31}H_{44}DN_{10}O_7$ | 672.3692       | 672.3675         |
| $b_5^+$        | $C_{36}H_{45}N_{10}O_6$  | 713.3524       | 713.3581         |
| $[z_6-H_2O]^+$ | $C_{40}H_{50}DN_{10}O_7$ | 784.4006       | 784.4070         |
| $[y_6-H_2O]^+$ | $C_{40}H_{51}DN_{11}O_7$ | 801.4271       | 801.4344         |
| $y_6^+$        | $C_{40}H_{53}DN_{11}O_8$ | 819.4376       | 819.4451         |

**Table S6.** CID fragmentation pattern for peptide **HYIQNHPLG**

| Fragment       | Molecular formula           | Calculated m/z | Experimental m/z |
|----------------|-----------------------------|----------------|------------------|
| $Y_3^+$        | $C_{13}H_{25}N_4O_3$        | 285.1770       | 295.1994         |
| $b_2^+$        | $C_{15}H_{16}DN_4O_3$       | 302.1364       | 302.1434         |
| $[b_6]^{2+}$   | $C_{36}H_{49}DN_{12}O_9$    | 398.1982       | 398.1910         |
| $b_3^+$        | $C_{21}H_{27}DN_5O_4$       | 415.2204       | 415.2261         |
| $[a_8]^{2+}$   | $C_{46}H_{67}DN_{14}O_{10}$ | 489.2692       | 489.2126         |
| $[b_8]^{2+}$   | $C_{47}H_{67}DN_{14}O_{11}$ | 503.2666       | 503.2787         |
| $[b_5-H_2O]^+$ | $C_{30}H_{39}DN_9O_8$       | 639.3114       | 639.3002         |
| $b_5^+$        | $C_{30}H_{41}DN_9O_8$       | 657.3219       | 657.3404         |
| $[b_6-CO]^+$   | $C_{35}H_{48}DN_{12}O_8$    | 766.3859       | 766.3432         |
| $Y_7^+$        | $C_{34}H_{55}N_{12}O_9$     | 777.4215       | 777.4690         |
| $b_6^+$        | $C_{36}H_{48}DN_{12}O_9$    | 794.4140       | 794.4104         |
| $z_8^+$        | $C_{43}H_{62}DN_{12}O_{11}$ | 923.5039       | 923.5138         |
| $Y_8^+$        | $C_{43}H_{64}DN_{13}O_{11}$ | 940.5148       | 940.5438         |

## IMAGES

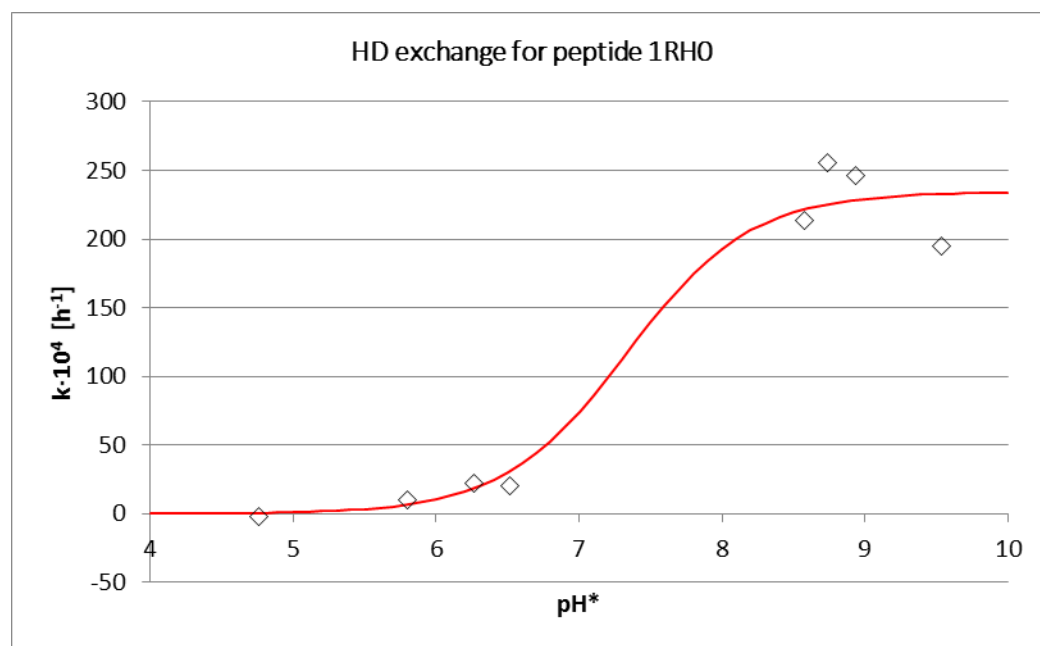**Fig. S1.** The dependence of HDX rate constant on pH for peptide 1RH0

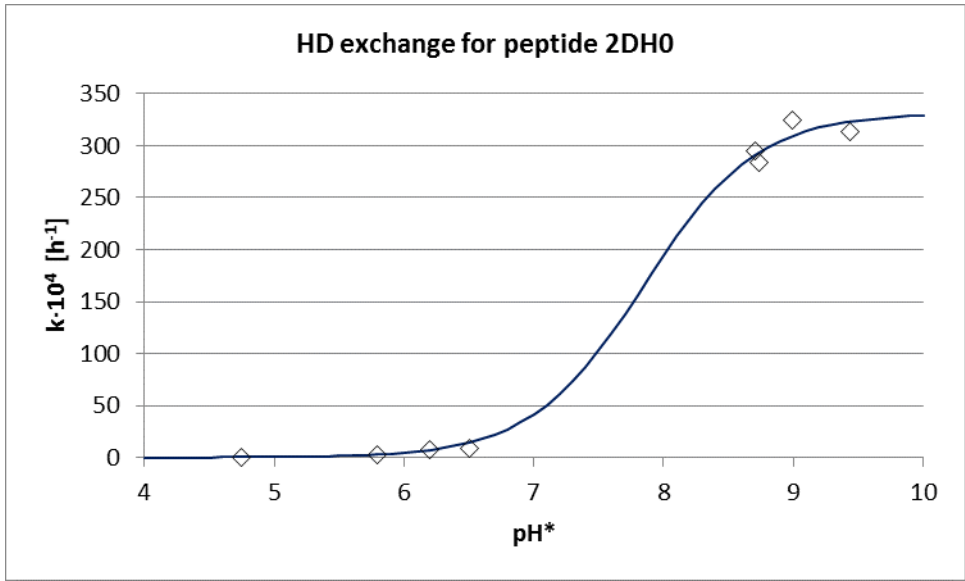

Fig. S2. The dependence of HDX rate constant on pH for peptide 2DH0

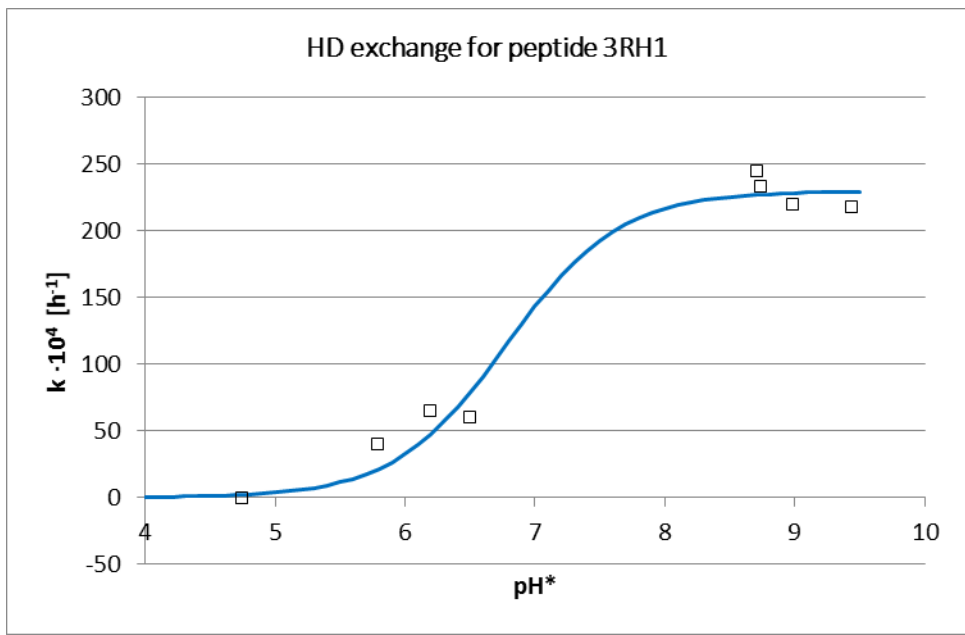

Fig. S3. The dependence of HDX rate constant on pH for peptide 3RH1

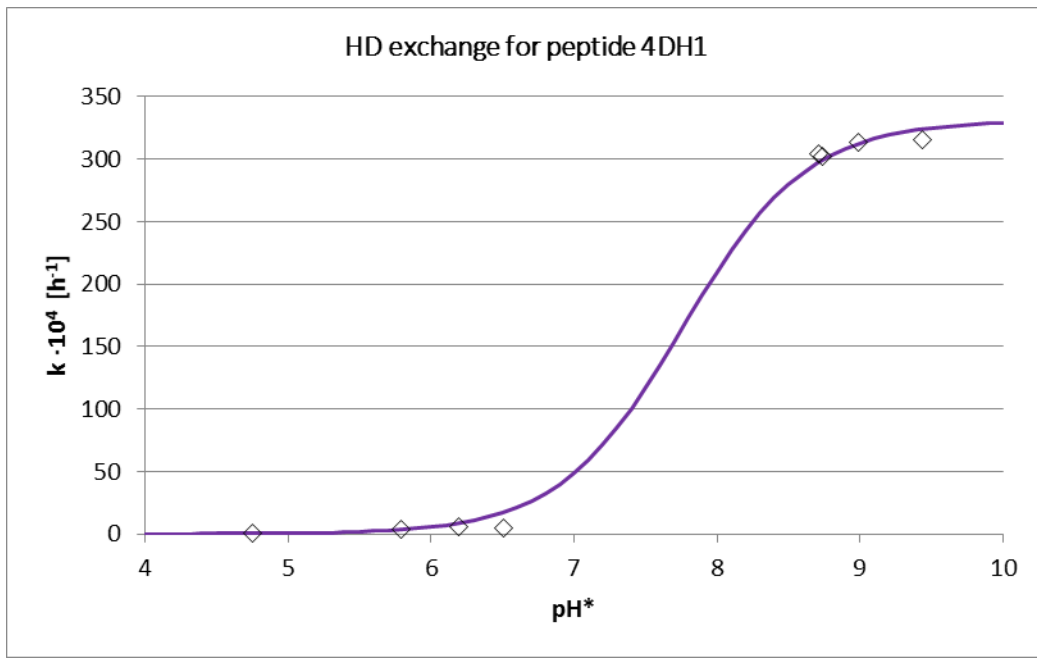

Fig. S4. The dependence of HDX rate constant on pH for peptide 4DH1

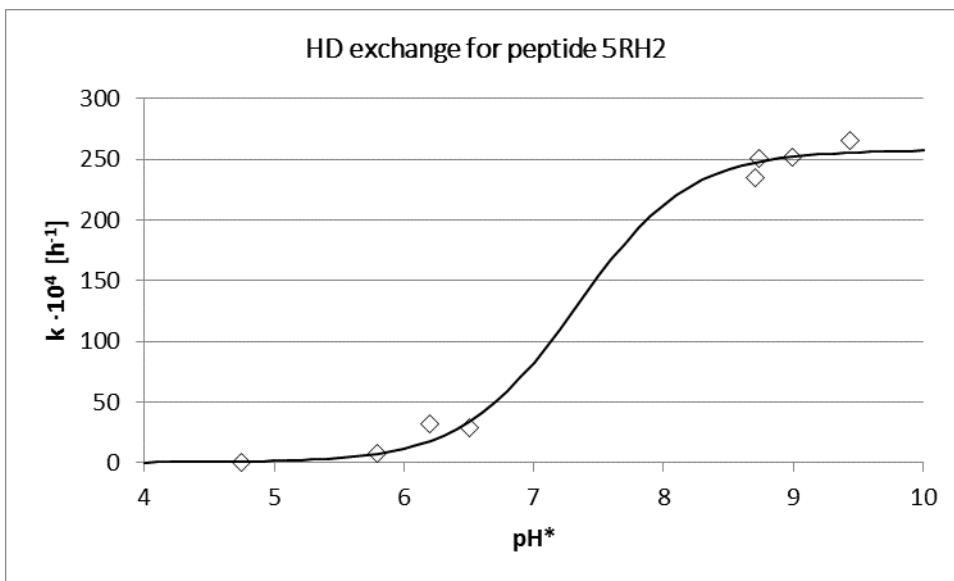

Fig. S5. The dependence of HDX rate constant on pH for peptide 5RH2

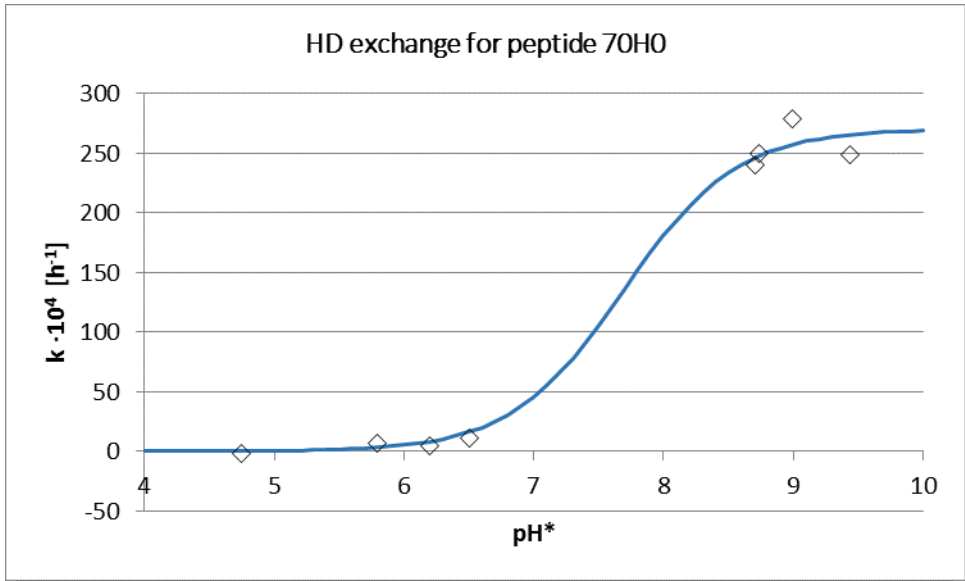

Fig. S6. The dependence of HDX rate constant on pH for peptide 70H0

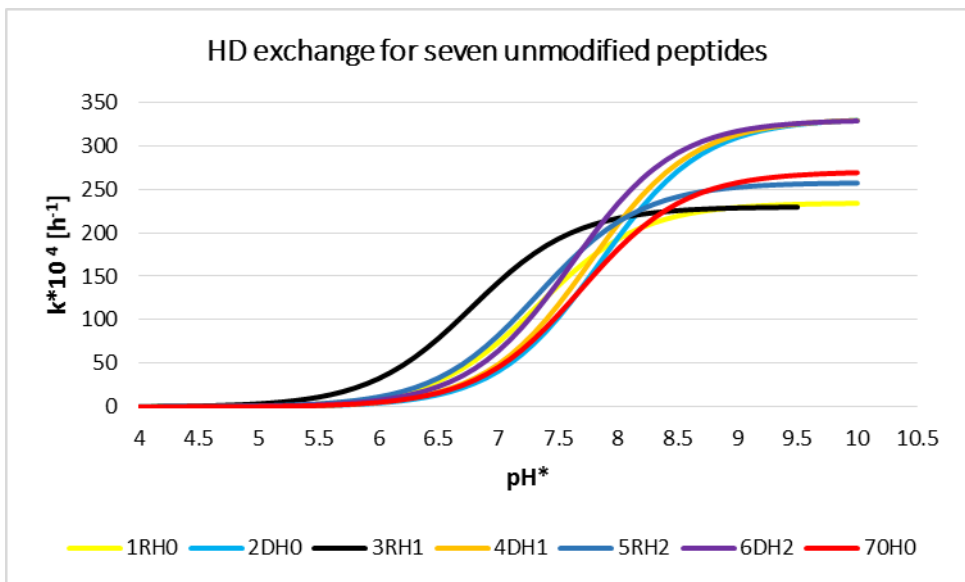

Fig. S7. The dependence of HDX rate constant on pH for all seven unmodified peptide
